# Supplementary material
Source: Research Square preprint supplement (doi:10.21203/rs.3.rs-9799296/v1)
Supplement: Supplementary file 1 [file 952e4c05e538ac6d77b8a20e.pdf]

**Table 1** Patient characteristics of 71 patients

| Characteristic                                   | DRIAs (n = 34)       | Placebo (n = 37)     | P value* |
|--------------------------------------------------|----------------------|----------------------|----------|
| Age, years                                       | 36.8 ± 7.1 (23–50)   | 37.2 ± 6.8 (21–49)   | 0.800    |
| Body weight, kg                                  | 55.6 ± 8.1 (42–69)   | 52.6 ± 7.0 (40–70)   | 0.097    |
| <b>Dysmenorrhea VAS score (0–100)</b>            | 59.4 ± 21.1 (20–100) | 60.7 ± 24.6 (20–100) | 0.813    |
| VAS score ≥ 50                                   | 22 (64.7%)           | 24 (64.9%)           | >0.99    |
| <b>Ovarian endometrioma diameter, mm</b>         | 31.5 (25.5–40.5)     | 32.0 (26.0–38.0)     | 0.991    |
| Diameter ≥ 50 mm                                 | 4 (11.8%)            | 7 (18.9%)            | 0.518    |
| <b>Serum CA125, IU/mL</b>                        | 32.8 (15.2–58.5)     | 31.5 (25.5–55.0)     | 0.717    |
| CA125 ≥ 35 IU/mL                                 | 15 (44.1%)           | 19 (51.4%)           | 0.637    |
| <b>Comorbidity (Uterine fibroid/adenomyosis)</b> | 8 (23.5%)            | 12 (32.4%)           | 0.440    |
| <b>Parity</b>                                    |                      |                      | 0.712    |
| 0                                                | 23 (67.6%)           | 24 (64.9%)           |          |
| 1                                                | 5 (14.7%)            | 8 (21.6%)            |          |
| ≥2                                               | 6 (17.6%)            | 5 (13.5%)            |          |
