# Supplementary material
Source: Research Square preprint supplement (doi:10.21203/rs.3.rs-9799296/v1)
Supplement: Supplementary file 2 [file ceec4ae433be09f75671340d.docx]

**Clinical Research Protocol**

**“Suppressive Effect of Nutritional Supplement (Aglycone-Type Isoflavone) on Endometriosis-Associated Pain (Clinical Trial)”**

**Research Protocol**

**Principal Investigator**
Taisuke Mori
Department of Obstetrics and Gynecology,
Kyoto Prefectural University of Medicine Hospital

**Revision History**

Version 1 – Created November 19, 2019
Version 2 – Created July 26, 2020
Version 3 – Created August 24, 2020
Version 4 – Created July 24, 2021
Version 5 – Created April 24, 2022
Version 6 – Created August 5, 2024

**0. Overview**

**0.1 Schema　Suppressive Effect of Nutritional Supplement (Aglycone-Type Isoflavone DRIAs) on Endometriosis-Associated Pain**

**Eligibility Criteria**

Patients diagnosed with endometriosis

Patients aged 20 years or older and younger than 50 years

Patients with a menstrual cycle length between 25 and 38 days and chronic pelvic pain with a VAS score of 20 or higher

→ **Registration and Randomization**

Target number of registered cases: 110 cases (DRIAs group: 55 cases; Placebo group: 55 cases)

Registration period:　From the date of publication on jRCT until March 31, 2027

**DRIAs Group**

Outline of treatment: Oral administration of 30 mg/day of aglycone-type isoflavone

Treatment period: 4 months

**Placebo Group**

Outline of treatment: Oral administration of placebo

Treatment period: 4 months

**Efficacy Assessment**

Primary endpoint: Improvement in pain before and after administration, evaluated using VAS.

**0.2 Objective:** To evaluate the suppressive effect of a nutritional supplement (aglycone-type isoflavone) on endometriosis-associated pain.

**0.3 Study Population**

Patients diagnosed with endometriosis who are aged 20 years or older and younger than 50 years and who have chronic pelvic pain with a VAS score of 20 or higher shall be included.

**0.4 Evaluation Items**

Primary Endpoint: Improvement in pain before and after administration of aglycone-type isoflavone. Menstrual pain shall be evaluated using VAS during routine outpatient visits.

Secondary Endpoints: Changes in the size of endometriotic cysts before and after administration of aglycone-type isoflavone shall be measured using transvaginal ultrasonography.Dyspareunia, pain during urination, and pain during defecation shall be evaluated using VAS during routine outpatient visits.Menstrual pain, dyspareunia, pain during urination, and pain during defecation are considered distinguishable; however, the sub-investigator shall provide explanations as appropriate.

Hematological testing, liver function evaluation, and CA125 assessment shall be performed through routine blood sampling. At routine outpatient visits, participants shall be interviewed regarding the occurrence of adverse effects and other events, and safety monitoring shall be continued.

**0.5 Planned Number of Registrations**

Target number of registered cases: 110 cases

**0.6 Study Period**

The planned trial implementation period (case registration period) shall be as follows:

Case registration period: From the date of publication on jRCT to March 31, 2027

Planned study implementation period: From the date of publication on jRCT to September 30, 2027

**0.7 Contact Information**

Inquiries regarding trial details: Trial Coordination Office
Department of Obstetrics and Gynecology, Kyoto Prefectural University of Medicine Hospital

465 Kajii-cho, Kawaramachi-Hirokoji, Kamigyo-ku, Kyoto 602-8566, Japan

Telephone: 075-251-5558 Reception hours: Weekdays 14:00–16:00

Contact Person: Fumitake Ito, Lecturer

**1. Objective**

The purpose of this study is to evaluate the suppressive effect of a nutritional supplement (aglycone-type isoflavone) on endometriosis-associated pain. The study population shall consist of patients diagnosed with endometriosis, aged 20 years or older and younger than 50 years, who have chronic pelvic pain with a VAS score of 20 or higher. The efficacy of the nutritional supplement (aglycone-type isoflavone; hereinafter referred to as DRIAs) shall be examined through a randomized comparison with placebo, and superiority shall be verified.

The evaluation items are as follows:

**Primary Endpoint:** Improvement in pain before and after administration of aglycone-type isoflavone. Menstrual pain shall be evaluated using the VAS during routine outpatient visits.

**Secondary Endpoints:** Changes in the size of endometriotic cysts before and after administration of aglycone-type isoflavone shall be measured by transvaginal ultrasonography.

Dyspareunia, pain during urination, and pain during defecation shall be evaluated using the VAS during routine outpatient visits. Menstrual pain, dyspareunia, pain during urination, and pain during defecation are considered distinguishable; however, the sub-investigator shall provide explanation as appropriate. Routine blood sampling shall be conducted for hematological testing, liver function evaluation, and CA125 assessment. At routine outpatient visits, participants shall be interviewed regarding the occurrence of adverse effects and related events, and safety monitoring shall be continuously maintained.

**2. Background and Rationale**

**1) Problems in the Treatment of Endometriosis**

Endometriosis is a disease in which tissue similar to the endometrium proliferates and develops outside the uterus. It occurs in approximately 10% of women of reproductive age and is a disease that significantly impairs quality of life by causing chronic pelvic pain and infertility. Although the cause has not been elucidated, factors such as immunity [1], inflammation [2], and endocrine mechanisms are involved in its onset and progression.

Various endocrine therapies, in addition to surgical treatment, are used for the treatment of endometriosis, including: GnRH agonists, dienogest, a synthetic progestin, low-dose estrogen-progestin combination agents (LEP formulations). These therapeutic agents are all based on the concept that endometriosis is an estrogen-dependent disease, and their principal mechanism is endocrine regulation of estrogen signaling and response mechanisms.

However, because these treatments suppress ovulation, they present challenges for patients with infertility, which is one of the major symptoms, in that: pregnancy cannot occur while taking the medication, and no improvement in pregnancy rates has been demonstrated. Therefore, development of new therapeutic agents that do not suppress ovulation is desired.

**2) Aglycone-Type Isoflavone**

Isoflavones are a class of polyphenolic compounds possessing an isoflavone skeleton.

Some isoflavones, such as daidzein, exhibit estrogen-like activity and are referred to as phytoestrogens. These primarily act via estrogen receptors (ER), but their mechanism of action is not simple, because they exhibit both estrogenic and inhibitory effects, including protective effects against breast cancer and osteoporosis. Their effects on endometriosis had not previously been known.

Isoflavones exist in two forms:

glycoside-type isoflavones, which contain sugar chains

aglycone-type isoflavones, from which sugar chains have been removed

Aglycone-type isoflavones are absorbed more rapidly and with higher bioavailability than glycoside-type isoflavones. Daidzein-rich aglycone-type isoflavones (DRIAs; AglyMax®), which are rich in the phytoestrogen daidzein, are already commercially available as health food supplements. Reported benefits include alleviation of hot flashes associated with menopause, promotion of implantation. However, no adverse effects have been reported.

**3) Effects of Aglycone-Type Isoflavones on Endometriosis (Basic Research)**

Using powdered DRIAs, we demonstrated that this agent exerts antiproliferative and anti-inflammatory effects on: endometriotic stromal cells, a mouse model of endometriosis

These effects were mediated via ERβ. However, the precursor of DRIAs used as a control, daidzein, as well as equol, did not exhibit these effects. These findings have been presented in: an international journal [4], major academic conferences [5]

**4) Effects of Aglycone-Type Isoflavones on Endometriosis (Preliminary Clinical Study)**

Based on the above basic research findings, we conducted a prior study (ERB-C-1202-1) in which DRIAs were administered for 4 months using the same protocol as in the present study to 17 patients with endometriosis-associated pain at our hospital and the Northern Medical Center. No adverse events were reported with respect to safety. Treatment resulted in a significant reduction in the visual analogue scale (VAS) score for dysmenorrhea, indicating improvement in menstrual pain, as well as a significant reduction in the size of endometriotic ovarian cysts (endometriomas, or “chocolate cysts”). The VAS score for dysmenorrhea decreased from 49.0 ± 9.4 before DRIAs administration to 24.6 ± 8.2 after 4 months. DRIAs significantly reduced VAS scores and improved menstrual pain beginning 2 months after treatment initiation (p < 0.01 at 4 months). In contrast, no significant changes were observed in VAS scores for dyschezia, dysuria, or dyspareunia. The diameter of endometriotic cysts decreased from 37.1 ± 2.5 mm before treatment to 34.2 ± 3.5 mm after 3 months and 32.7 ± 3.2 mm after 4 months, with a significant reduction observed from 3 months after treatment initiation (p < 0.05). Statistical analysis was performed using the Mann–Whitney U test.

These results were presented at the 41st Annual Meeting of the Japan Society of Endometriosis [6].

As described above, based on the findings from basic research using in vitro experiments and mouse models, we conducted a preliminary clinical study and obtained evidence suggesting potential efficacy. Therefore, in the present application, we will conduct a randomized, placebo-controlled, double-blind trial to obtain further evidence. Although aglycone isoflavones are already commercially available as dietary supplements, the primary endpoint of this study is pain relief. By alleviating pain, this intervention is expected to contribute to improving the quality of life of patients with endometriosis.

**3. Standards and Definitions Used in This Study**

**3.1 Diagnostic Criteria**
The diagnosis of endometriosis will be made in accordance with the Guidelines for the Management of Endometriosis, Part 2: Treatment and Clinical Practice, edited by the Japan Society of Obstetrics and Gynecology (for the evaluation criteria used in this trial after case registration, see “10. Clinical Tests, Observations, Assessment Items, and Schedule”). In routine clinical practice, cases diagnosed comprehensively on the basis of subjective symptoms, physical examination, and laboratory/imaging findings are managed as clinically diagnosed endometriosis. The diagnostic accuracy of clinically diagnosed endometriosis by board-certified gynecologists is reported to be approximately 80%. Although subtle peritoneal lesions and mild adhesions are difficult to diagnose without direct visualization, ovarian endometriomas (“chocolate cysts”) and deep infiltrating endometriosis can be diagnosed based on physical examination findings and imaging studies (Japan Association of Obstetricians and Gynecologists).

As described above, a definitive diagnosis of endometriosis requires direct visualization by laparoscopy; however, it is not feasible to perform laparoscopic surgery in all cases. Therefore, in cases of clinically diagnosed endometriosis, it is possible that some patients with other conditions may be inadvertently included in the study population. Consequently, the inclusion of such cases may potentially affect the assessment of pain outcomes.

**3.2 Disease Staging**
Disease staging will be classified according to the revised American Society for Reproductive Medicine (r-ASRM) classification system (Guidelines for the Management of Endometriosis, Part 2: Treatment and Clinical Practice, edited by the Japan Society of Obstetrics and Gynecology).

**4. Investigational Product / Investigational Device Information**

**4.1 Investigational Product**

Overview of the Investigational Product

**1) Investigational Drug**

Investigational product: DRIAs, Generic name: AglyMax30

DRIAs is a koji mold–fermented soybean germ extract containing **at least 33.0% total isoflavone aglycone equivalents** and an **isoflavone aglycone ratio of at least 95.0%**. In endometriotic stromal cells, it exerts an antiproliferative effect through binding to estrogen receptors.

**Distribution / Market Experience:** Since its launch in 2004, more than **60,000 units** of this product have been sold. In addition, dietary supplements containing the same common active ingredients have achieved sales of more than **300,000 units**.

**Safety:**
No health hazards have been reported in association with the above sales history, and based on its history of food consumption, the product is considered to have a sufficiently high level of safety. Furthermore, the daily intake has been formulated in compliance with the Basic Principles for the Safety Evaluation of Foods for Specified Health Uses Containing Soy Isoflavones, published by the Food Safety Commission of Japan in May 2006.

**Shelf Life:** Two years from the date of manufacture.

**2) Control Product**
As per the formulation, the control product is identical to DRIAs except that the aglycone isoflavone component has been removed. Its safety profile and shelf life are equivalent to those of DRIAs.

**Toxicity.** In nonclinical studies conducted to date, single-dose administration of DRIAs to male and female rats at doses of **1,000 mg/kg body weight** and **2,000 mg/kg body weight** resulted in no abnormalities or deaths. The median lethal dose (**LD₅₀**) was therefore estimated to be greater than **2,000 mg/kg body weight**. In addition, when DRIAs was administered to male and female rats at a dose of **2,000 mg/kg body weight** for **4 weeks**, a significant decrease in body weight was observed in both sexes. However, no treatment-related changes were detected in urinalysis, hematological examinations, organ weights at necropsy, or histopathological evaluations. Based on these findings, the no-observed-adverse-effect level (**NOAEL**) is considered to exceed **2,000 mg/kg body weight**.

**4.1.1 Pharmacokinetics**

**1) Investigational Product and Placebo**
There are two forms of isoflavones: the **glycoside form** and the **aglycone form**. Genistin and daidzin are the principal glycoside isoflavones. Although these compounds are abundant in soybeans, their absorption in the body requires degradation by intestinal bacteria because they are conjugated with high-molecular-weight sugar moieties.

Aglycone isoflavones, in which the sugar moiety has been removed from the glycoside form, are absorbed rapidly and efficiently regardless of intestinal bacterial activity. Genistein and daidzein, the principal aglycone isoflavones, are derived from genistin and daidzin, respectively.

DRIAs is an aglycone isoflavone preparation manufactured through fermentation of soybean germ with Aspergillus oryzae (koji mold), followed by extraction and concentration processes. Its isoflavone composition consists of **daidzein, genistein, and glycitein in a ratio of 7:1:2.**

Although the blood concentrations of each individual component cannot be measured, participants will receive isoflavones at the **recommended upper daily intake level established by the Food Safety Commission of Japan (30 mg/day as aglycone equivalents).**

**4.1.2 Composition, Content, and Dosage Form of Investigational Product**

| **Component** | **DRIAs** | **Placebo** |
| --- | --- | --- |
| AglyMax | 38.25 | — |
| Vitamin E-containing adjusted oil | 1.25 | 1.25 |
| Resistant dextrin | 25 | 25 |
| Maltitol | 75 | 110.88 |
| Dextrin | 24.25 | 24.25 |
| Crystalline cellulose | 55 | 55 |
| Starch | 12.5 | 12.5 |
| Sucrose ester | 12.5 | 12.5 |
| Tricalcium phosphate | 6.25 | 6.25 |
| Caramel coloring | — | 0.3 |
| Gardenia coloring | — | 2.08 |

Subtotal: 250 / 250

| **Coating Component** | **DRIAs** | **Placebo** |
| --- | --- | --- |
| Shellac | 1.375 | 1.38 |
| Carnauba wax | Trace | Trace |

Total: 251.375 / 251.375

As shown in the table above, DRIAs and the placebo are identical in mass and are both light brown tablets that are indistinguishable in appearance. Both are odorless. For administration, both products should be taken with one glass of water (approximately 200 mL) and swallowed whole without chewing or crushing.

**4.1.3 Labeling and Packaging of the Investigational Product**
Details are provided in the separately established Standard Operating Procedures for the Management of Investigational Products for this study.

**4.1.4 Storage Conditions for the Investigational Product**
Store at room temperature (storage conditions: room temperature, protected from light, humidity-controlled, etc.).

**4.1.5 Provision, Storage, Management, and Retrieval of the Investigational Product**
The principal investigator will receive the investigational product from the product provider. The investigational product administrator will be responsible for the management of the supplied investigational products, any unused investigational products, used packaging boxes, and all records of investigational product accountability. These procedures shall be conducted in accordance with the Standard Operating Procedures for the Management of Investigational Products established for this study. The investigational product shall be used exclusively for this study and must not be used for any other purpose.

**4.1.6 Prescription/Dispensing of the Investigational Product**
The principal investigator or sub-investigator will prescribe/dispense the investigational product in accordance with the study schedule. At that time, participants will be given sufficient instructions regarding the handling of the investigational product, including the return of any unused investigational product.

**4.1.7 Investigational Product Provider**
Nichimo Biotics Co., Ltd.

**5. Study Population and Eligibility Criteria**

**5.1 Inclusion Criteria**

Patients who meet all of the following criteria and who have provided written informed consent prior to enrollment in this study will be eligible for participation.

**Inclusion Criteria:**

1. Patients diagnosed with endometriosis
2. Patients aged 20 years or older and younger than 50 years
3. Patients with a menstrual cycle length between 25 and 38 days
4. Patients with chronic pelvic pain with a Visual Analogue Scale (VAS) score of 20 or higher

**Rationale for Criteria:**
1)–4): To allow appropriate evaluation of efficacy.
4): The threshold of VAS ≥20 (out of 100 points) was selected based on the preliminary study, in which an improvement of 24.4 points was observed.

**5.2 Exclusion Criteria**

Patients meeting any of the following criteria will be excluded from participation:

1. Patients who had taken nutritional supplements containing isoflavones within the 3 months prior to the study visit
2. Patients who had used GnRH analogs, endocrine preparations containing progestins or estrogens as the principal active ingredients, low-dose oral contraceptives, medium-dose oral contraceptives, testosterone derivatives, or Kampo medicines indicated for endometriosis within the 3 months prior to the study visit
3. Patients who had undergone surgical treatment for endometriosis, including transvaginal ethanol sclerotherapy, laparotomy, or laparoscopy, within the 3 months prior to the study visit
4. Patients who are pregnant or suspected to be pregnant at the time of the study visit
5. Patients who become pregnant during study participation
6. Patients who are breastfeeding at the time of the study visit
7. Patients whom the principal investigator or sub-investigator determines to be unsuitable for participation in this study for any other safety-related reason

**Rationale for Criteria:**
1)–5): Because these factors may affect the evaluation of efficacy.
4)–7): For safety considerations.

**6. Registration and Randomization**

**6.1 Procedure for Case Registration**

Case Registration Procedure: The principal investigator or sub-investigator shall complete the required information on the separately designated case registration form and register the participant by anonymizing the information and sending the form by email to the case registration center. Upon confirming the contents of the case registration form, the case registration center shall notify the relevant principal investigator or sub-investigator that anonymization and case registration have been completed.

Method of Anonymization: YYY-ZZZ
YYY: Study site identification number

001 Kyoto Prefectural University of Medicine Hospital, 002 Kyoto First Red Cross Hospital

003 Kusatsu General Hospital, 004 Ito Women's Clinic, 005 Kiyoko Clinic, 006 Kyoto Second Red Cross Hospital, 007 Kyoto Chubu Medical Center, ZZZ: Sequential participant number assigned at the relevant study site at the time informed consent is obtained.

**Example:** The first participant enrolled at Kyoto Prefectural University of Medicine Hospital would be assigned the identification number 001-001.

**6.2 Randomization Method and Allocation Adjustment Factors**

Randomization Method: Each participant will be randomly assigned to receive either DRIAs or placebo. Randomization will be performed by an unblinded study drug allocation manager using an adaptive randomization method based on the minimization method with dynamic allocation probabilities.

The following factors will be used as allocation adjustment factors at the time of randomization:

VAS score for dysmenorrhea prior to study drug administration: <50 vs. ≥50

Diameter of endometriotic cyst: <5 cm vs. ≥5 cm

CA125 level: <35 U/mL vs. ≥35 U/mL

**6.3 Blinding**

**Blinding Procedure**
After obtaining informed consent for study participation, the sub-investigator shall immediately prepare the case registration form and submit it to the case registration center.

The case registration center shall report the following:

1. Notify the sub-investigator that registration has been completed.
2. Notify the unblinded staff member at Nichimo Biotics Co., Ltd. (the study drug allocation manager) of the anonymized participant identification number and the allocation factors prior to study drug administration. *(report format: center to Nichimo)*
3. Notify Direct Marketing Group Co., Ltd. (DMG) of the anonymized participant identification number, participant name, and shipping address. *(report format: center to DMG)*

The unblinded study drug allocation manager at Nichimo Biotics Co., Ltd. shall randomly assign each participant to either the active treatment group or the placebo group. The assigned investigational product (DRIAs or placebo), in a manner that does not reveal treatment identity, shall then be sent to a third-party organization responsible for shipment management.

The third-party organization, Direct Marketing Group Co., Ltd. (DMG), shall ship the investigational product directly to the participant’s home.

To maintain blinding, the placebo will be packaged identically to DRIAs, and caramel coloring will be used so that the tablets are indistinguishable in appearance. These measures ensure the maintenance of double blinding.　This study will be conducted as a double-blind trial, and blinding shall be maintained throughout the study for all study personnel except the study drug allocation manager, according to the following procedures:

- The study drug allocation manager shall prepare the treatment allocation list.
- The study drug allocation manager shall ensure that the investigational products are indistinguishable in appearance, packaging, and label presentation.
- The study drug allocation manager shall seal and securely retain the allocation list until unblinding.
- If unused investigational products or remaining tablets are collected prior to unblinding, they shall be collected in sealed condition by the investigational product administrator to preserve blinding.

**6.4 Storage of the Allocation List and Unblinding Procedures**

**6.4.1 Storage of the Allocation List**

The study drug allocation list shall be retained by the study drug allocation manager until unblinding. It shall be stored securely in a locked cabinet.

**6.4.2 Unblinding Procedures**

1) Routine Unblinding
After all study data have been finalized (database lock), the principal investigator shall request disclosure of the treatment allocation list from the study drug allocation manager.

2) Emergency Unblinding
If the principal investigator determines that knowledge of the treatment allocation is necessary to ensure participant safety, such as in the event of a serious illness or other medical emergency, the emergency key code shall be disclosed in accordance with the separately established *Emergency Key Code Unblinding Procedures* for this study.

**7. Ethics**

**7.1 Conduct of the Study in Compliance with Applicable Laws and Ethical Considerations**

This study shall be conducted in compliance with the ethical principles based on the Declaration of Helsinki (1964) and its subsequent amendments, the Clinical Trials Act of Japan, the Act on the Protection of Personal Information, the Act on the Protection of Personal Information Held by Administrative Organs, the Act on the Protection of Personal Information Held by Incorporated Administrative Agencies, relevant ordinances established by local governments, the applicable Standard Operating Procedures (SOPs), and this study protocol.

**7.2 Certified Clinical Research Review Board (CRB)**

**7.2.1 Review for Study Implementation**

This study shall undergo review by a **Certified Clinical Research Review Board (CRB)** to determine the appropriateness of conducting the study from ethical, scientific, medical, and pharmaceutical perspectives.

**7.2.2 Continuing Review**

1. The principal investigator shall submit a written report summarizing the current status of the study to the administrator of the study institution once annually, or more frequently if requested by the Certified Clinical Research Review Board, and shall also submit such report to the CRB. After obtaining the opinion of the CRB, the principal investigator shall report to the Minister of Health, Labour and Welfare.
2. The administrator of the study institution may, as necessary, seek the opinion of the Certified Clinical Research Review Board regarding the appropriateness of continuing the study at the study site.

**7.3 Protection of Participants’ Personal Information**

All personnel involved in this study shall give full consideration to the protection of participants’ personal information and privacy in accordance with applicable laws and regulations.

Participants shall be identified in the registration process and case report forms using participant identification codes. During direct access to source documents, participants’ informed consent forms, and publication of study results, sufficient precautions shall be taken to protect participants’ names, medical conditions, privacy, and personal information. The case report forms created for this study shall not be used for purposes other than this study. Information obtained through this study shall not be disclosed to third parties except when required by public authorities. When study results are published, no information that could identify individual participants shall be included. Furthermore, biological specimens, imaging data, or other participant-derived materials obtained in this study shall not be used for purposes other than those specified in this study.

**7.4 Information Provided to Patients and Informed Consent**

**7.4.1 Preparation of the Written Explanation and Consent Documents**

The principal investigator shall prepare the written explanation document and informed consent form and obtain prior approval from the Clinical Research Ethics Review Board.

Items to be included in the explanation document shall be prepared with reference to the Clinical Trials Act, including, but not limited to, the following:

1. The title of the specified clinical research, confirmation that the study has been approved by the administrator of the study institution, and confirmation that the study protocol has been submitted to the Minister of Health, Labour and Welfare
2. The name of the study institution and the name and title of the principal investigator (for multicenter studies, the name and title of the coordinating principal investigator, the names of participating institutions, and the names and titles of responsible investigators at those institutions)
3. The reason the participant was selected for the study
4. The anticipated benefits and risks associated with participation
5. A statement that participation is entirely voluntary
6. Information regarding withdrawal of consent
7. A statement that refusal to participate or withdrawal of consent will not result in any disadvantageous treatment
8. The method of public disclosure of information regarding the study
9. A statement that participants or their legally authorized representatives may obtain or review the study protocol and other study-related materials, and how to do so
10. Information regarding protection of participants’ personal information
11. Methods for storage and disposal of study materials and data
12. Information regarding involvement as specified under Article 21, Paragraph 1 of the Clinical Trials Act
13. Procedures for handling complaints and inquiries
14. Information regarding study-related costs
15. Availability and details of alternative treatments, including comparison of expected benefits and risks
16. Compensation and medical care for health injuries related to study participation
17. Information regarding the Certified Clinical Research Review Board responsible for ethical review, including its review responsibilities
18. Any other matters necessary for implementation of the study, including:
19. Conditions and reasons for discontinuing participation
20. A statement that participants will be promptly informed if new information becomes available that may affect their willingness to continue participation, and that their intention to continue participation will be reconfirmed
21. Whether pharmaceutical manufacturers or related entities are involved in the study, and details of such involvement
22. A statement that the Certified Clinical Research Review Board, Ministry of Health, Labour and Welfare, or other relevant authorities may review study-related records during monitoring or audits, and that signing the consent form constitutes agreement to such access, with appropriate protection of personal information
23. The names and contact information of the principal investigator and sub-investigators
24. Participant responsibilities during study participation

In addition, the following information shall be disclosed or communicated to clinical research participants through the informed consent documents or public disclosure:

1. The purpose and methods of use of specimens and information (including provision to other institutions, if applicable)
2. The categories of specimens and information to be used or provided
3. The scope of individuals or entities permitted to use such specimens and information
4. The name of the person or entity responsible for management of the specimens and information
5. A statement that, upon request by the participant or their representative, use of identifiable specimens/information or provision to other research institutions will be discontinued
6. Procedures for submitting such requests

**7.4.2 Timing and Method of Obtaining Consent**

Before participation in the study, the principal investigator or sub-investigator shall provide the patient with a full explanation using the written explanation document and shall provide sufficient opportunity for questions and adequate time for consideration.

After confirming that the patient fully understands the contents, written informed consent shall be obtained directly from the patient based on their own free will.

The informed consent form shall be signed or stamped and dated by both:

- the principal investigator or sub-investigator providing the explanation, and
- the patient indicating consent to participate after fully understanding the explanation document.

If a research collaborator provides supplementary explanation, that collaborator shall also sign or stamp and date the consent form.

A copy of the signed informed consent form, together with the explanation document, shall be provided to the patient. The original signed consent form shall be retained at the study institution together with the patient’s medical records.

**7.4.3 Consent by a Legally Authorized Representative**

Only patients capable of providing written informed consent personally shall be eligible for participation in this study. Therefore, consent by a legally authorized representative shall not be required.

**7.4.4 Revision of the Explanation and Consent Documents**

If new efficacy or safety information becomes available that may affect the participant’s willingness to continue participation, the principal investigator or sub-investigator shall promptly inform the participant, confirm their intention regarding continued participation, and document the discussion.

The principal investigator shall promptly revise the explanation document based on such information and obtain approval from the Certified Clinical Research Review Board and other relevant authorities. Using the revised explanation document, the principal investigator or sub-investigator shall provide a full explanation to the participant, reconfirm the participant’s willingness to continue participation, and obtain renewed written informed consent. In addition, if the intended use of specimens or information was explained to participants as fully as possible at the time consent was obtained, but a new purpose of use is later identified, the coordinating principal investigator shall prepare or revise the study protocol accordingly and notify participants or publicly disclose the newly identified purpose of use. In principle, participants must be guaranteed an opportunity to withdraw their consent regarding the continuation of the study.

**8.2 Discontinuation of Treatment**

**8.2.1 Criteria for Discontinuation of Protocol Treatment**

The principal investigator shall promptly discontinue protocol treatment for the relevant participant if any of the following circumstances occur:

1. The participant (or legally authorized representative) requests discontinuation of treatment
2. Worsening or recurrence of the underlying disease (endometriosis) is observed
3. The principal investigator or sub-investigator determines that continuation of treatment is not feasible due to illness or other medical conditions
4. The entire study is terminated
5. The treatment period or dosage exceeds the allowable limits specified in the protocol
6. The underlying disease improves and protocol treatment is no longer considered necessary
7. The participant dies during protocol treatment
8. Continuation of protocol treatment becomes difficult due to worsening of comorbid conditions
9. It is discovered after initiation of protocol treatment that the participant did not meet the eligibility criteria
10. Follow-up of the participant cannot be continued due to transfer to another hospital or other reasons
11. The participant (or legally authorized representative) withdraws consent
12. Any other reason for which the principal investigator or sub-investigator determines that continuation of treatment is not feasible

**8.2.2 Management of Participants Who Discontinue Protocol Treatment**

Participants who discontinue protocol treatment shall continue to be followed, except in the cases listed below. The follow-up schedule is described in “10. Endpoints, Clinical Assessments, and Evaluation Schedule.” Even if protocol-specified observations cannot be performed due to transfer to another institution or other circumstances, outcome information shall be obtained from the receiving institution whenever possible, and the method and date of acquisition shall be documented in the medical record or equivalent source documentation.

Follow-up will not be conducted in the following cases:

1. The participant has died
2. The participant has withdrawn consent for post-discontinuation follow-up
3. The participant is found to be ineligible after initiation of protocol treatment
4. Follow-up is otherwise considered infeasible

**8.3 Criteria for Modification / Delay**

**8.3 Provisions Regarding Treatment Delay**

No treatment delay shall be permitted.

**8.4 Concomitant Therapy and Supportive Care**

**8.4.1 Prohibited Concomitant Treatments**

The following therapies and medications are prohibited from 3 months prior to initiation of protocol treatment, as they may affect the efficacy and/or safety evaluation of this study or may compromise participant safety. Prohibited concomitant therapies: GnRH analog therapy, Low-dose estrogen–progestin therapy, Prohibited concomitant medications:, Supplements containing isoflavones

**8.5 Post-Study Treatment**

After discontinuation or completion of protocol treatment, no restrictions shall be imposed on subsequent treatment.

**9. Evaluation and Reporting of Adverse Events**

**9.1 Definition of Adverse Events**

An adverse event refers to any disease, disorder, death, or infection suspected to be caused by the conduct of this specified clinical research, including unintended signs, abnormal clinical laboratory values, symptoms, or worsening of pre-existing complications. A serious adverse event (SAE) refers to any adverse event that falls into one of the following categories:

1. Death
2. An adverse event that is life-threatening
3. An adverse event requiring hospitalization or prolongation of existing hospitalization for treatment
4. Disability or permanent impairment
5. An adverse event that may result in disability or permanent impairment
6. Any other medically significant adverse event considered equivalent in seriousness to items 1–5
7. A congenital disease or abnormality in a subsequent generation

A device deficiency refers broadly to any malfunction or inadequacy of the investigational device, including breakage, operational failure, or other defects. An effect caused by a device deficiency refers to any impact resulting from such malfunction, breakage, operational failure, or other defect, regardless of whether the issue arose during the stages of design, distribution, storage, or use. Cases in which it is unclear whether the event was caused by a device deficiency shall also be included. An unanticipated device deficiency refers to a deficiency not described in the investigator’s brochure (or, in studies intended for partial amendment approval of marketing authorization, the package insert), or a deficiency whose nature or severity is inconsistent with the documented description.

**9.2 Evaluation of Adverse Events**

All adverse events occurring from the start of investigational product administration / investigational device use until the end of the study period shall be evaluated in accordance with the procedures below, regardless of whether a causal relationship with the study intervention is considered present.

For adverse events occurring after the end of the study period, only those for which a causal relationship with the investigational product or investigational device cannot be ruled out shall be subject to observation.

**9.3 Definition of Serious Adverse Events**
A serious adverse event (SAE) is defined as any adverse event that falls into one of the following categories:

1. Death
2. A life-threatening adverse event
3. An adverse event requiring hospitalization or prolongation of existing hospitalization for treatment
4. Disability
5. An adverse event that may result in disability
6. Any other adverse event considered medically significant and comparable in seriousness to items 1–5
7. A congenital disease or abnormality in a subsequent generation

However, even if hospitalization occurs, the following shall **not** be considered serious adverse events:

- Hospitalization for treatment of a pre-existing comorbidity that existed prior to initiation of treatment and is unrelated to the occurrence of a new adverse event or worsening of an existing condition
- Hospitalization solely for diagnostic examinations without treatment, or for educational purposes
- Visits to an emergency department, outpatient emergency treatment, admission to a rehabilitation facility, or similar circumstances not meeting the definition of hospitalization for treatment

**9.4 Definition of Device Deficiency**

A device deficiency refers to any defect or inadequacy related to the quality, safety, performance, or functionality of the investigational device (excluding commercially available devices used as control devices), including breakage, malfunction, or other failures.

This definition applies regardless of whether the issue arose during the stages of design, distribution, storage, or use.

**9.5 Evaluation of Device Deficiencies**

If a device deficiency occurs, it shall be evaluated in accordance with the procedures described below.

**9.6 Management and Reporting of Adverse Events**

**9.6.1 Measures for Participants**

If an adverse event occurs in a participant, the principal investigator and sub-investigator shall first ensure the participant’s treatment and safety and provide appropriate medical management.

Any adverse events that have not resolved by the end of the study or remain unresolved at the time of study discontinuation shall be followed until one of the following conditions is met: Resolution of the event, Stabilization of the event, Determination that the event is attributable to factors unrelated to the investigational product/device, Further follow-up information cannot reasonably be obtained (e.g., the participant or the attending physician at another institution refuses to provide additional information, or follow-up becomes impossible despite reasonable efforts)

**9.6.2 Evaluation and Documentation of Adverse Events**

The principal investigator and sub-investigator shall document all adverse events in the source documents (i.e., records necessary to reconstruct and evaluate the factual course of the study, such as medical records), including: Findings/signs and symptoms, Date of onset, Severity, Seriousness, Assessment of causal relationship, Whether treatment or intervention was required, Outcome

**9.6.3 Notification and Reporting of Serious Adverse Events or Device Deficiencies**

(1) Notification to the Administrator of the Study Institution, Principal Investigators at Other Study Sites, and the Investigational Product/Device Provider

The sub-investigator shall promptly report any adverse event to the principal investigator after its occurrence, regardless of whether a causal relationship with the investigational product or investigational device is suspected. The principal investigator shall immediately notify the following parties of any serious adverse event suspected to be related to the use of the investigational product/device, or any device deficiency considered likely to cause a serious adverse event:

- The administrator of the relevant study institution
- The principal investigators at other participating study institutions
- The investigational product/device provider

**(2) Reporting to Regulatory Authorities**

The coordinating principal investigator, upon receiving a report of a serious adverse event from a principal investigator, shall consult with all principal investigators to determine whether the event meets the criteria for 7-day reporting or 15-day reporting under Article 56 of the Enforcement Regulations of the Clinical Trials Act. If reporting is deemed necessary, the coordinating principal investigator shall submit the report to the regulatory authority jointly in the names of all principal investigators.

**9.7 Anticipated Adverse Events**
Based on the results of clinical studies conducted to date, no adverse events or side effects are anticipated in this study.

**10. Clinical Tests, Observations, Survey Items, and Schedule**

**10.1 Study Calendar (Flowchart)**

| Date | Before treatment | 1month later | 2 months | 3 months | 4 months | 1 month after completion of treatment |
| --- | --- | --- | --- | --- | --- | --- |
| Informed consent obtained | ○ | - | - | - | - | - |
| Assessment items | ○ | ○ | ○ | ○ | ○ | ○ |
| Blood tests  （CA125） | ○ | - | - | - | - | ○ |
| Adverse event | - | ○ | ○ | ○ | ○ | ○ |

**10. Study Period and Assessments**

**10.2 Study Period**

The study period for each participant and its components are defined as follows:

- Study period: From the date informed consent is obtained until 1 month after completion of DRIAs or placebo administration
- End of treatment: 1 month after completion of DRIAs or placebo administration

**10.3 Clinical Assessments, Observations, and Evaluation Items**

**Participant Background:** Date of birth, sex, medical history, comorbidities, presence of allergies (food and medications), date of informed consent, smoking history, alcohol consumption history

**Physical Assessments:** Performance Status, height, weight, blood pressure, pulse rate, body temperature

**Symptom Assessments:** VAS for dysmenorrhea, dyspareunia, dysuria, and dyschezia

**Clinical Tests:** Hematological tests, biochemical tests, transvaginal ultrasonography, CA125

**10.3.1 Pre-registration Assessments**

**Assessment period:** From the date of informed consent to registration

**Participant background:** Date of birth, sex, medical history, comorbidities, presence of allergies (food and medications), date of informed consent, previous treatment history

**Pathological examinations:** Histopathology and/or cytology (if available)

**Imaging:** Transvaginal ultrasonography

**Physical assessments:** Height, weight

**Hematological tests:** White blood cell count, neutrophil count, hemoglobin, platelet count

**Biochemical tests:** ALT, AST, LDH, CRP, CA125

**10.3.2 During Treatment**

**Assessment period:** From initiation of protocol treatment to completion of protocol treatment

The day of protocol treatment initiation shall be defined as Day 1, and the week beginning on Day 1 shall be defined as Week 1.

**Protocol treatment:** Treatment duration, administered dose, medication compliance, treatment interruption period and reason, treatment discontinuation status, date and reason for discontinuation

**Concomitant treatment / supportive care:** Treatment period, treatment details

**Monthly Assessments (every 1 month after treatment initiation)**

**Physical assessments:** Weight

**Subjective and objective findings:** Vomiting, alopecia, skin disorders, and other clinically relevant findings

**End-of-Treatment Assessments**

**Timing:** At completion of protocol treatment (allowable window: within 7 days after the final day of protocol treatment)

**Physical assessments:** Weight

**Subjective and objective findings:** Vomiting, alopecia, skin disorders

**Hematological tests:** White blood cell count, neutrophil count, hemoglobin, platelet count

**Biochemical tests:** ALT, AST, LDH, CRP, CA125

Additional observations or examinations may be performed as clinically indicated based on symptoms, signs, or laboratory findings.

**10.3.3 At Protocol Treatment Discontinuation**

**Timing:** At discontinuation of protocol treatment (allowable window: within 7 days after discontinuation)

**Physical assessments:** Performance Status, weight

**Subjective and objective findings:** Vomiting, alopecia, skin disorders

**Hematological tests:** White blood cell count, neutrophil count, hemoglobin, platelet count

**Biochemical tests:** ALT, AST, LDH, CRP

**Treatment discontinuation information:** Final day of protocol treatment, date discontinuation was determined, time point of discontinuation, reason for discontinuation

**10.3.4 Post-treatment / Post-discontinuation Follow-up**

**Physical assessments:** Performance Status, weight

**Subjective and objective findings:** Vomiting, alopecia, skin disorders

**Hematological tests:** White blood cell count, neutrophil count, hemoglobin, platelet count

**Biochemical tests:** ALT, AST, LDH, CRP

**Treatment completion/discontinuation information:** Final day of protocol treatment, date discontinuation was determined, time point of discontinuation, reason for discontinuation

**10.4 Measurement of Drug Concentration**

Blood sampling for measurement of plasma drug concentrations will not be performed.

**11. Data Collection**

**11.1 Data Submission**

The principal investigator and other designated study personnel shall prepare, amend, or correct the case report forms (CRFs) in accordance with the Guidelines for Completion and Correction of Case Report Forms.

Preparation, amendment, and correction of the CRFs shall be performed by the principal investigator or sub-investigator. However, for information that does not require medical judgment and can be directly transcribed from source documents, research staff may complete the CRFs under the supervision of the principal investigator or sub-investigator.

The principal investigator shall submit the completed CRFs to the study coordinating office. A copy of the submitted CRFs shall be retained by the principal investigator.

**11.2 Precautions for Completion of Case Report Forms**

The principal investigator or sub-investigator shall complete the CRF promptly after completion of the final observation for the relevant participant. For CRFs completed by a sub-investigator or research staff, the principal investigator shall review the entries, amendments, and corrections and confirm that there are no issues. If any discrepancy exists between the contents of the CRF and the source documents, the principal investigator shall prepare a record explaining the discrepancy with the source documents. Any queries regarding the CRF contents shall be answered promptly, and any necessary corrections or amendments shall be made without delay.

**For Paper-Based CRFs**

Entries in the CRF shall be made using a black-ink ballpoint pen or equivalent permanent writing instrument. Pencils or mechanical pencils shall not be used.

For items that were not assessed, a diagonal slash shall be entered to distinguish them from missing entries. If corrections to recorded information are required, correction fluid or correction tape shall not be used. Instead, the incorrect entry shall be crossed out with a double line, and the person making the correction shall provide their signature or printed name and seal, together with the date and reason for the correction, so that an audit trail is maintained. Signatures and seals used for such corrections shall be those registered in advance in the signature and seal log.

**12. Target Sample Size and Planned Study Period**

**12.1 Target Number of Participants:** 110 participants

**12.2 Planned Study Period**

**Participant enrollment period:** From the date of publication on the jRCT to March 31, 2027
**Planned study period:** From the date of publication on the jRCT to September 30, 2027

**13. Endpoints**

**13.1 Primary Endpoint**

Primary endpoint: Improvement in pain before and after administration of DRIAs.

Dysmenorrhea will be evaluated using the Visual Analogue Scale (VAS) during routine outpatient visits. VAS assessments will be performed directly by the sub-investigator during face-to-face clinical examinations.

Because pain assessment is quantified using VAS scores, accurate evaluation is considered feasible.

Concomitant use of analgesics during the study period will be permitted, as pain assessment will be based on the VAS score measured prior to analgesic administration.

**13.2 Secondary Endpoints**

**13.2.1 Secondary Efficacy and Safety Assessments**

Changes in the size of endometriotic cysts before and after administration of aglycone isoflavones will be measured by transvaginal ultrasonography. Dyspareunia, dysuria, and dyschezia will be evaluated using the VAS during routine outpatient visits. Although dysmenorrhea, dyspareunia, dysuria, and dyschezia are considered distinguishable symptoms, the sub-investigator will provide additional explanation as appropriate to ensure accurate assessment. Routine blood tests will be performed to assess hematological parameters, liver function, and CA125 levels. The presence or absence of adverse effects and other safety concerns will be assessed through interviews during routine outpatient visits, and safety monitoring will be continued throughout the study.

**13.2.2 Cyst Response**

Cyst response will be evaluated by measuring the diameter of endometriotic cysts using transvaginal ultrasonography. The long axis and short axis of each cyst will be measured, and the mean of these two measurements will be defined as the cyst diameter.

**13.2.3 Adverse Events**

The relationship between adverse event grade and treatment group will be compared.

For participants experiencing adverse events, a summary listing will be prepared including the following information: reported adverse event term, seriousness, severity, causal relationship, and outcome.

**13.2.4 Health-Related Quality of Life**

Health-related quality of life will be assessed using the Japanese version of the EQ-5D questionnaire.

**14. Statistical Considerations**

**14.1 Target Sample Size and Rationale**

**Target sample size:** 110 participants

**Rationale:** In the preliminary study conducted in 2018, the number of patients aged 20–40 years diagnosed with endometriosis at our hospital and the Northern Medical Center was 60. Assuming that half of these patients would agree to receive aglycone isoflavone treatment, approximately 30 participants per year could be enrolled. Enrollment of an additional 20 participants per year from the collaborating study sites is considered feasible based on the prevalence of endometriosis.

In the preliminary study (n = 17), the mean improvement (change) in dysmenorrhea VAS score among patients receiving DRIAs was 24.4, with a standard deviation of 25.8 [6]. Consistent with previous reports [7], the placebo effect was assumed to account for 40% of the observed treatment effect; therefore, the expected improvement (change) in the placebo group was assumed to be 9.8 (= 24.4 × 0.4). Based on these assumptions, the expected treatment difference was 14.6 (= 24.4 − 9.8), with a common standard deviation of 25.8. Assuming a statistical power of 80% and a two-sided significance level (α = 0.05) using a two-sample t-test, 50 participants per group are required.

Assuming a dropout rate of 10%, the planned total sample size for this study was set at 110 participants.

**14.2 Analysis Populations**

For efficacy analyses, the Full Analysis Set (FAS) shall be used as the primary analysis population. For analyses of adverse events, the Safety Analysis Set shall be used.

In addition, for exploratory purposes, efficacy analyses will also be performed using the Per Protocol Set (PPS).

Definitions of the analysis populations are as follows:

Full Analysis Set (FAS): All registered participants shall be included, except for participants found to be ineligible after registration; and participants for whom all post-registration data are missing.

Per Protocol Set (PPS): Participants in the FAS who have evaluable primary endpoint data both before and after initiation of protocol treatment; and completed protocol treatment in accordance with the study protocol.

Safety Analysis Set: All participants who received protocol treatment at least once.

**14.3 Statistical Analysis Methods**

The primary objective of this study is to demonstrate the superiority of the investigational treatment group over the control group with respect to the primary endpoint, namely improvement in pain before and after treatment. If statistical superiority of the investigational treatment group over the control group is demonstrated, protocol treatment will be considered beneficial.

Unless otherwise specified, all statistical tests will be conducted using a two-sided significance level of 5%.

**14.3.1 Primary Endpoint**

**Improvement in pain before and after administration of aglycone isoflavones**

Dysmenorrhea will be evaluated using the Visual Analogue Scale (VAS) during routine outpatient visits. Between-group comparisons will be performed using a **two-sample t-test**.

**14.3.2 Secondary Endpoints**

Changes in the size of endometriotic cysts before and after administration of aglycone isoflavones will be assessed by transvaginal ultrasonography.

Dyspareunia, dysuria, and dyschezia will be evaluated using the VAS during routine outpatient visits.

Routine blood testing will be performed to assess hematological parameters, liver function, and CA125.

Between-group comparisons for: endometriotic cyst size, VAS scores for dyspareunia, dysuria, and dyschezia, and clinical laboratory values will be performed using a two-sample t-test.

Safety will be continuously monitored by interviews conducted during routine outpatient visits to assess the occurrence of adverse effects and other safety concerns.

The following nine laboratory parameters will be evaluated:

Hematological tests: white blood cell count, neutrophil count, hemoglobin, platelet count
Biochemical tests: ALT, AST, LDH, CRP, CA125

**Subgroup Analysis**

Subgroup analyses for the primary endpoint will be conducted according to the following baseline stratification factors:

- Dysmenorrhea VAS score (<50 vs. ≥50)
- Endometriotic cyst diameter (<5 cm vs. ≥5 cm)
- CA125 (<35 U/mL vs. ≥35 U/mL)
- Hematological test results (within normal range vs. abnormal)
- Biochemical test results (within normal range vs. abnormal)

**14.4 Interim Analysis**

No interim analysis will be performed.

**15. Protocol Compliance, Management of Noncompliance, Amendments, and Revisions**

**15.1 Compliance with the Study Protocol**

The principal investigator shall submit the study protocol, documents describing the investigational product, procedures for the management of adverse events, and other required documents as stipulated under the Clinical Trials Act to the Certified Clinical Research Review Board (CRB) for review and comment, and shall obtain approval from the administrator of the study institution before initiating the study. The principal investigator and sub-investigators shall conduct the study in compliance with the study protocol.

**15.2 Management of Protocol Noncompliance or Amendments**

The principal investigator shall not implement any protocol deviation or amendment without prior written approval based on review by the Certified Clinical Research Review Board, except in the following circumstances:

1. When medically unavoidable to eliminate an immediate hazard to a participant
2. When the change concerns only administrative aspects of the study

In the case described in (1) above, the principal investigator shall submit the details and reasons for the deviation or amendment, together with a proposed protocol revision if appropriate, to the administrator of the study institution and the Certified Clinical Research Review Board as soon as possible and obtain approval. The principal investigator shall promptly report in writing to the administrator of the study institution and the Certified Clinical Research Review Board any study changes that may significantly affect study conduct or increase risk to participants.

The principal investigator shall document and retain written records of all protocol deviations.

**15.3 Protocol Revisions**

The coordinating principal investigator shall revise the study protocol as necessary when becoming aware of important information relating to the quality, efficacy, or safety of the investigational product, or any other information essential for the proper conduct of the study. The coordinating principal investigator shall also revise the study protocol when instructed to do so by the Certified Clinical Research Review Board, as appropriate. The coordinating principal investigator shall prepare the proposed protocol revision, report the details and rationale for the revision to the administrator of the study institution, and obtain approval from the Certified Clinical Research Review Board.

**16. Study Completion or Early Termination**

**16.1 Study Completion**

After completion of all observations, examinations, and assessments specified in this study protocol for all participants, the principal investigator shall submit a written report to the administrator of the study institution stating that the study has been completed, together with a summary of the study results. When the period for collection of data relating to all endpoints specified in the clinical research implementation plan has ended, the principal investigator (or the coordinating principal investigator in the case of a multicenter study) shall, in principle, amend the implementation plan and prepare a final study report and summary within one year from that date. The final study report and summary shall be submitted to the Certified Clinical Research Review Board for review and comment and shall also be submitted without delay to the administrator of the study institution.

Within one month from the date on which the Certified Clinical Research Review Board provides its opinion, the report shall be submitted to the Minister of Health, Labour and Welfare and publicly disclosed through registration in the Japan Registry of Clinical Trials (jRCT). The date of such public disclosure shall be regarded as the official completion date of the clinical trial.

**16.2 Early Termination of the Study**

The coordinating principal investigator shall consult with the study coordinating office regarding early termination of the study under any of the following circumstances:

1. When the coordinating principal investigator determines that continuation of the study is difficult due to issues relating to the quality, efficacy, or safety of the investigational product
2. When the administrator of the study institution instructs termination due to issues relating to the quality, efficacy, or safety of the investigational product
3. Any other circumstances in which the coordinating principal investigator considers termination necessary

If the study coordinating office determines that the study should be terminated, the study shall be discontinued according to the following procedures:

- The coordinating principal investigator shall immediately notify all principal investigators of the decision to terminate the study.
- The principal investigator shall promptly inform participants of the termination and the reasons for it and shall ensure participant safety.
- The principal investigator shall report the termination in writing to the administrator of the study institution, the Certified Clinical Research Review Board, and the relevant departments of the affiliated institution, and shall discontinue the study in accordance with institutional procedures.

After completion of the above procedures, the coordinating principal investigator shall submit notification of study termination to the regulatory authority.

If the study is terminated or suspended, the principal investigator shall promptly notify participants and their legally authorized representatives, and shall continue to provide appropriate medical care and any other necessary measures following study termination.

**17. Compensation**

If a participant suffers health impairment due to an adverse event, the principal investigator or sub-investigator shall immediately provide appropriate medical examination and treatment. If medical care is required for the adverse event, the participant shall be informed accordingly. For this study, the coordinating principal investigator has obtained clinical research insurance. If a participant experiences health injury for which a causal relationship with the conduct of this study cannot be ruled out, and such injury is determined to be eligible for compensation under the insurance policy, compensation shall be provided. Any health injury arising from participation in this clinical trial shall be treated appropriately according to the participant’s medical condition under the Japanese public health insurance system, in the same manner as ordinary medical care. In such cases, the participant shall be responsible for the standard self-pay portion of medical expenses. No additional financial compensation, including consolation payments or allowances, shall be provided.

**18. Conflict of Interest and Funding Source**

**18.1 Conflict of Interest**

The principal investigator shall prepare a conflict of interest (COI) management plan based on the COI management standards confirmed by the administrator of the study institution, obtain the opinion of the Certified Clinical Research Review Board, and appropriately manage any conflicts of interest. A conflict of interest refers to a situation in which the fairness and appropriateness of research conduct may be compromised, or may reasonably be perceived by a third party to be compromised, due to financial relationships with companies or other entities, such as manipulation of data in favor of a sponsoring company or disregard of unfavorable data.

Conflicts of interest related to this study shall be managed in accordance with the regulations on conflict of interest established by the Kyoto Prefectural University of Medicine regulations concerning conflicts of interest in clinical research. Assistant Professor Osamu Takaoka, Department of Obstetrics and Gynecology who is involved in this study, jointly holds a patent with a company for the use of aglycone isoflavones as a therapeutic agent for endometriosis. Dr. Takaoka shall not be involved in data management, monitoring, or statistical analysis.

These matters have been self-disclosed and reviewed and approved by a committee including external experts. This study shall be conducted fairly and appropriately, without influence from the interests or intentions of the funding source or related parties.

**18.2 Funding Source**

This study will be supported from Grants-in Aid for Scientific Research (22K16839) from the Ministry of Education, Culture, Science, and Technology (Japan).

The investigational products required for this study (DRIAs and placebo) will be provided free of charge by Nichimo Biotics Co., Ltd., the manufacturer and distributor of the products. Nichimo Biotics Co., Ltd. will be involved only in treatment allocation and shipment of the investigational products and will have no involvement whatsoever in: study design, study conduct, data collection, data storage, statistical analysis, or interpretation of study results.

**19. Financial Arrangements**

Participation in this study will not impose any financial burden on participants. Accordingly, no monetary payments will be made to participants.

**20. Data Quality Control and Quality Assurance**

**20.1 Quality Control**

**20.1.1 Quality Control**

This study shall be conducted in compliance with the Clinical Trials Act. At each stage of the study, the following quality control measures shall be implemented in accordance with the study-specific Standard Operating Procedures.Risk-based monitoring and data management shall be adopted as quality control methods in this study.

1. Regular monitoring shall be conducted at the study sites to confirm:
   - the qualifications of the participating study institutions and principal investigators;
   - management status of the investigational product/device;
   - proper acquisition of written informed consent from participants;
   - collection of information relating to adverse events; and
   - conduct of the study in compliance with the protocol and applicable laws and regulations.
2. The contents of the case report forms shall be compared with source documents and other study-related records to confirm the accuracy of the recorded data.
3. Confirmation shall be made that all study-related records required under the Clinical Trials Act are created accurately, completely, and appropriately retained.

At each stage of study conduct, meetings with medical experts, principal investigators, sub-investigators, and other relevant personnel may be held as necessary.

**20.1.2 Identification of Source Documents Subject to Direct Access**

The following constitute the source documents supporting study data, as well as data directly entered into case report forms for which no prior written or electronic source record exists.

1) Source Documents Supporting Study Data

- Records relating to participant consent and provision of information to participants (e.g., signed informed consent forms, referral letters)
- Medical records or worksheets (documents created specifically for this study and attached to medical records), nursing records, participant registration documents, assessment/examination/observation records required by this study (e.g., laboratory data, films, laboratory request forms), and other records used for preparation of the CRF
- Records relating to study treatment as specified in this protocol (e.g., investigational product/device accountability logs, prescription records)

**2) Data for Which the CRF or Adverse Event Report Constitutes the Source Document**

- Determination of inclusion/exclusion criteria
- Assessment of severity of medical history and comorbidities
- Reason for use of concomitant medications or therapies
- Seriousness, severity, outcome, causal relationship, and comments regarding adverse events
- Reason for study discontinuation and comments regarding outcome
- Comments by the principal investigator or other study physicians

**20.2 Direct Access**

The administrator of the study institution and the principal investigator shall permit and cooperate with monitoring, auditing, review by the Certified Clinical Research Review Board, and inspections by regulatory authorities. In such cases, all study-related records, including source documents, shall be made available for direct access upon request by monitors, auditors, the Certified Clinical Research Review Board, or regulatory authorities. Appropriate measures shall be taken to protect participants’ personal information. Monitors shall conduct direct access, including comparison of source documents and case report forms, to confirm that:

- the study is being conducted safely and appropriately in compliance with the Clinical Trials Act, the study protocol, Standard Operating Procedures, and applicable regulations; and
- data reliability is adequately ensured.

If discrepancies are identified between source documents and case report forms, the monitor shall obtain a written explanation from the principal investigator.

**20.3 Quality Assurance**

To ensure that study conduct and the generation, documentation, and reporting of data comply with the study protocol and the Clinical Trials Act, an auditor shall conduct audits at the study coordinating office and participating study institutions and confirm that quality control measures are being appropriately implemented.

Audits shall be conducted in accordance with the audit procedures and based on a pre-established audit plan.

**21. Record Retention**

**21.1 Study Institutions**

The administrator of each study institution shall retain the documents required to be maintained at the study institution for the period specified by applicable laws, regulations, and the Clinical Trials Act. The coordinating principal investigator shall notify the administrator of the study institution when retention of such materials is no longer required.

**21.2 Coordinating Principal Investigator**

The coordinating principal investigator shall retain the documents required to be maintained by the coordinating principal investigator for the period specified by applicable laws, regulations, and the Clinical Trials Act.

**22. Publication of Study Results**

**22.1 Clinical Trial Registration**

This study shall be registered in the Japan Registry of Clinical Trials (jRCT) and publicly disclosed prior to enrollment of the first participant.

**222 Publication of Study Results**

The study results shall be disseminated through submission of a protocol manuscript describing the study design to a medical journal, presentations at scientific meetings, and submission of manuscripts reporting the study findings to peer-reviewed medical journals. Data obtained in this study may be secondarily used (e.g., for meta-analysis) in a form that cannot be linked to personally identifiable participant information. A primary endpoint report and/or final study report, together with a summary thereof, shall be prepared, submitted to the Certified Clinical Research Review Board for review and comment, reported to the administrator of the study institution, and registered in the jRCT.

**23. References**

1. Tanaka Y, Takaoka O, Kitawaki J, et al. Exacerbation of endometriosis due to regulatory T-cell dysfunction. *J Clin Endocrinol Metab.* 2017;102:3206–3217.
2. Harada T, et al. Increased interleukin-6 levels in peritoneal fluid of infertile patients with active endometriosis. *Am J Obstet Gynecol.* 1997;176:593–597.
3. Khaodhiar L, et al. Daidzein-rich isoflavone aglycones are potentially effective in reducing hot flashes in menopausal women. *Menopause.* 2008;15:125–132.
4. Takaoka O, Mori T, Ito F, Kitawaki J, et al. Daidzein-rich isoflavone aglycones inhibit cell growth and inflammation in endometriosis. *J Steroid Biochem Mol Biol.* 2018;181:125–132.
5. 69th Annual Congress of the Japan Society of Obstetrics and Gynecology (Award recipient), 32nd Annual Meeting of the Japan Society for Reproductive Medicine, 12th Annual Meeting of the Japan Society of Reproductive Endocrinology, 5th Annual Meeting of the Japanese Society of Supplement Science, 39th Annual Meeting of the Japan Society of Endometriosis.
6. Takaoka O, et al. Daidzein-rich isoflavone aglycones reduce endometriotic cyst size and improve VAS scores. Presented at the **41st Annual Meeting of the Japan Society of Endometriosis**, January 18, 2020.
7. Hideto M. The impact of placebo in patients with Parkinson’s disease. *Jpn J Clin Pharmacol Ther.* 2009;40:145–150.

**24. Appendices**

- Japanese version of EQ-5D
- r-ASRM classification

**24.1 Coordinating Principal Investigator**

Role: Responsible for coordination among participating study institutions in multicenter clinical research, including detailed coordination of protocol implementation, resolution of protocol interpretation issues arising during the study, and consolidation of reports concerning serious adverse events.

Department of Obstetrics and Gynecology, Kyoto Prefectural University of Medicine Hospital
465 Kajii-cho, Kawaramachi-Hirokoji, Kamigyo-ku, Kyoto 602-8566, Japan
Tel: +81-75-251-5558 (Outpatient Obstetrics and Gynecology Clinic)

Coordinating Principal Investigator: Taisuke Mori, MD, PhD, Professor

**24.2 Principal Investigators**

Role: Responsible for protocol preparation and revision, preparation and revision of informed consent documents, submission for institutional approval, preparation of study procedures, participant selection and informed consent acquisition, supervision of sub-investigators and research staff, CRF preparation and correction, reporting of serious adverse events, participant compensation, retention of essential documents, adverse event reporting to the Ministry of Health, Labour and Welfare, preparation of the final study report, and other study-related duties.

Principal Investigators: Taisuke Mori, MD, PhD, Professor, Kyoto Prefectural University of Medicine Hospital, Tomoharu Okubo, MD, PhD, Department Head, Kyoto First Red Cross Hospital

**24.3 Committees**

Not applicable.

**24.4 Investigational Product / Allocation Manager / Investigational Product Manager**

Investigational Product: DRIAs (*Agrimax®*)

Provider: Nichimo Biotics Co., Ltd.
Hamamatsucho 7F1-6-15 Hamamatsucho, Minato-ku, Tokyo, Japan

Investigational Product Allocation Manager / Product Manager: Nobuaki Hamajima

**24.5 Storage and Distribution of Investigational Product**

Direct Marketing Group Co., Ltd.
Orix Hommachi Building 7F, 1-4-1 Nishihommachi, Nishi-ku, Osaka, Japan

**24.6 Study Coordination Office**

Role: Responsible for smooth and efficient operational management of the clinical study based on knowledge and methodologies for clinical research management.

Study Coordination Office Department of Obstetrics and Gynecology, Kyoto Prefectural University of Medicine Hospital, 465 Kajii-cho, Kawaramachi-Hirokoji, Kamigyo-ku, Kyoto 602-8566, Japan
Tel: +81-75-251-5558, Contact Person: Fumitake Ito, MD, PhD, Lecturer

**24.7 Participant Registration Center**

Role: Responsible for confirming participant eligibility based on the inclusion/exclusion criteria in the protocol and notifying principal investigators of registration and allocation results.

Participant Registration Center Department of Obstetrics and Gynecology
Kyoto Prefectural University of Medicine Hospital, 465 Kajii-cho, Kawaramachi-Hirokoji, Kamigyo-ku, Kyoto 602-8566, Japan Tel: +81-75-251-5558, Office hours: Weekdays 14:00–16:00

Contact Person: Fumitake Ito, MD, PhD, Lecturer

**24.8 Statistical Analysis**

Role: Responsible for development of the statistical design (including analysis populations, statistical methods, interim analysis plans, and sample size determination), preparation of the Statistical Analysis Plan, and conduct of data analyses in accordance with the plan, from protocol development through final study reporting.

Study Coordination Office: Kyoto Prefectural University of Medicine Hospital, Department of Obstetrics and Gynecology, Contact: Fumitake Ito, MD, PhD

**24.9 Data Management**

Role: Responsible for: 1) Preparation for data management (data management plan, sample CRFs, database construction, CRF checklists), 2) Data management (including database entry), 3) Query generation and data cleaning, 4) Coding (medical history, comorbidities, adverse events, medications)

Study Coordination Office: Kyoto Prefectural University of Medicine Hospital, Contact: Fumitake Ito, MD, PhD

**24.10 Monitoring**

Role: Conduct monitoring activities.

Study Coordination Office: Kyoto Prefectural University of Medicine Hospital, Department of Obstetrics and Gynecology, Office hours: Weekdays 14:00–16:00

Monitor: Miyoko Waratani, MD, PhD

**24.11 Audit**

Role: Independently and separately from routine monitoring and quality control, evaluate whether the study is being conducted in compliance with applicable laws, guidelines, the study protocol, and Standard Operating Procedures for quality assurance purposes.

Kyoto Prefectural University of Medicine Hospital Department of Obstetrics and Gynecology

Auditor: Hiroyuki Okimura, MD, PhD, Assistant Professor

**24.12 Medical Writing**

Role: Preparation of the draft final study report.

Kyoto Prefectural University of Medicine Hospital, Department of Obstetrics and Gynecology, Contact: Fumitake Ito, MD, PhD
